# Supplementary material for: A quantitative mechanistic PK/PD model directly connects Btk target engagement and in vivo efficacy
Source: PubMed Central journal article supplement — Chem Sci. 2017 Mar 14;8(5):3434–43. doi: 10.1039/c6sc03306g (PMC5417014; doi:10.1039/c6sc03306g), 2017-03-14
Supplement: SC-008-C6SC03306G-s001.pdf [file SC-008-C6SC03306G-s001.pdf]

## Supporting Information

### **A Quantitative Mechanistic PK/PD Model Directly Connects Btk Target Engagement and *In Vivo* Efficacy**

Fereidoon Daryaee<sup>a,1</sup>, Zhuo Zhang<sup>a,1</sup>, Kayla R. Gogarty<sup>a</sup>, Yong Li<sup>a</sup>, Jonathan Merino<sup>a</sup>, Stewart L. Fisher<sup>b,2</sup>  
and Peter J Tonge<sup>a,2</sup>

<sup>a</sup>Institute for Chemical Biology & Drug Discovery, Department of Chemistry, Stony Brook University,  
Stony Brook NY 11794-3400

<sup>b</sup>C4 Therapeutics, Cambridge, MA 02142

<sup>1</sup>These authors contributed equally to this work.

<sup>2</sup>Authors to whom correspondence should be addressed:

SLF: [stewfisher@slfisherconsulting.com](mailto:stewfisher@slfisherconsulting.com); PJT: [peter.tonge@stonybrook.edu](mailto:peter.tonge@stonybrook.edu)

## SI Materials and Methods

### Synthesis of BDP-CC-292 (5), a fluorescent analog of CC-292

A covalent fluorescent Btk probe, BDP-CC-292, was synthesized from CC-292 as shown in **Scheme S1**. This method involved the synthesis of an azide derivative of CC-292 that was subsequently coupled to an alkyne analog of the fluorescent dye BODIPY using click chemistry. Each intermediate was purified by flash column chromatography and characterized by ESI-MS,  $^1\text{H}$  and  $^{13}\text{C}$  NMR. The final probe was purified by HPLC and characterized by ESI-MS.

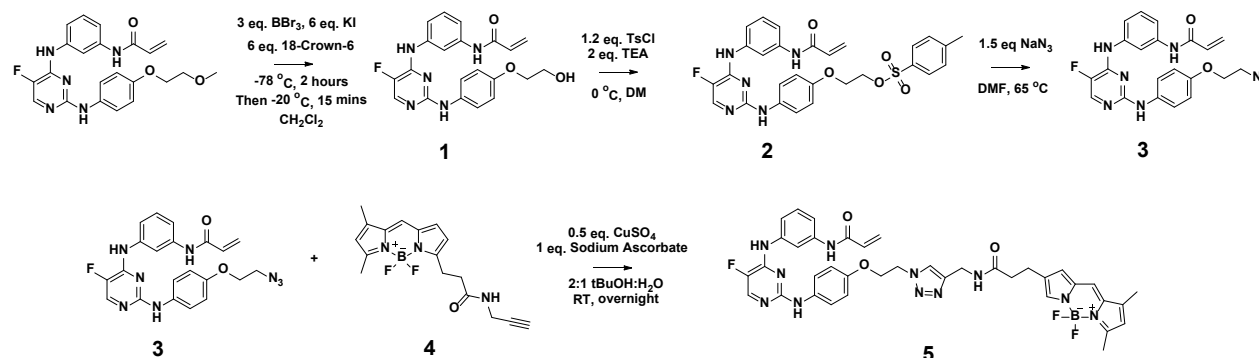

**Scheme S1.** Synthesis of BDP-CC-292 (5)

#### Demethylated CC-292 (1)

A solution of CC-292 (AVL-292, Ontario Chemicals Incorporated, 98% purity, CAS # 1202757-89-8) in 1 mL DCM was stirred at  $-80\text{ }^{\circ}\text{C}$  for 5 min after which 120 mg of potassium iodide (KI) and 190 mg 18-Crown-6 were added.  $\text{BBr}_3$  was dissolved in 1 mL of DCM and cooled to  $-80\text{ }^{\circ}\text{C}$ . The solution of  $\text{BBr}_3$  in DCM was then added dropwise to the solution of CC-292 which was stirred continuously. After stirring for 1 h at  $-80\text{ }^{\circ}\text{C}$ , the mixture was warmed to  $-20\text{ }^{\circ}\text{C}$  and stirred for another 15 min. Upon completion of the reaction, which was confirmed by TLC, the reaction was quenched by the addition of 2 mL saturated  $\text{NaHCO}_3$  solution. The quenched reaction was stirred at RT for 10 min before the mixture was concentrated by rotary evaporation. The residual solution was extracted with 50 mL EtOAc for 3 times, and the organic layers were combined and then dried with  $\text{MgSO}_4$ . Evaporation under vacuum yielded crude product (1) which was purified by CombiFlash chromatography using a silica column.

ESI MS Calculated for  $\text{C}_{21}\text{H}_{20}\text{FN}_5\text{O}_3$   $m/z$   $[\text{M}+\text{H}]^+$  410.16, found 410.1,  $^1\text{H}$  NMR (400 MHz, Methanol- $d_4$ )  $\delta$  ppm 3.85 (t,  $J=4.80$  Hz, 2 H), 4.00 (t,  $J=4.80$  Hz, 2 H), 5.78 (dd,  $J=9.41$ , 2.13 Hz, 1 H), 6.33 - 6.40 (m, 1 H), 6.40 - 6.48 (m, 1 H), 6.80 - 6.86 (m, 2 H), 7.25 - 7.30 (m, 1 H), 7.38 - 7.45 (m, 4 H), 7.87 (d,  $J=4.02$  Hz, 1 H), 8.05 (t,  $J=2.00$  Hz, 1 H).  $^{19}\text{F}$  NMR (376 MHz, Methanol- $d_4$ )  $\delta$  ppm -168.86 (s., 1F).

#### CC-292-Tosylate (2)

Demethylated CC-292 (1) (10 mg), 0.01 mL triethylamine (TEA) and 1 mg DMAP were added to a 10 mL RBF containing 0.5 mL DCM. The mixture was cooled to  $0\text{ }^{\circ}\text{C}$  and then stirred for 5 min. 4-Toluenesulfonyl chloride (TsCl) was dissolved in 0.5 mL DCM in a glass vial and cooled to  $0\text{ }^{\circ}\text{C}$ . The TsCl solution was then added to the solution of 1 dropwise at  $0\text{ }^{\circ}\text{C}$ , which was then stirred at  $0\text{ }^{\circ}\text{C}$  for 10 min and then warmed to RT. The reaction mixture was stirred for another 12 h and when the reaction was shown to be complete by TLC the solution was evaporated under vacuum. Crude product (2) was obtained as a yellow residue and used in the next step without further purification.

### Azido-CC-292 (3)

Crude CC-292-Tosylate (**2**) (13 mg) was added to a 10 mL RBF containing 0.5 mL DMF and 3 mg NaN<sub>3</sub>. The mixture was stirred at 65°C overnight and iced cold water was added after TLC demonstrated that the reaction was complete. The aqueous mixture was extracted with 10 mL EtOAc for 3 times and the organic layers were combined and dried with MgSO<sub>4</sub>. After filtering, the solvent was evaporated under vacuum and the crude solid product was purified by CombiFlash chromatography using a silica column.

ESI MS Calculated for C<sub>21</sub>H<sub>19</sub>FN<sub>8</sub>O<sub>2</sub>  $m/z$  [M+H]<sup>+</sup> 435.44, found 435.1, <sup>1</sup>H NMR (400 MHz, Methanol-*d*<sub>4</sub>)  $\delta$  ppm 3.85 (t,  $J$ =4.80 Hz, 2 H), 4.00 (t,  $J$ =4.80 Hz, 2 H), 5.78 (dd,  $J$ =9.41, 2.13 Hz, 1 H), 6.33 - 6.40 (m, 1 H), 6.40 - 6.48 (m, 1 H), 6.80 - 6.86 (m, 2 H), 7.25 - 7.30 (m, 1 H), 7.38 - 7.45 (m, 4 H), 7.87 (d,  $J$ =4.02 Hz, 1 H), 8.05 (t,  $J$ =2.00 Hz, 1 H). <sup>19</sup>F NMR (376 MHz, Methanol-*d*<sub>4</sub>)  $\delta$  ppm -168.74 (d,  $J$ =4.09 Hz). <sup>13</sup>C NMR (126 MHz, Methanol-*d*<sub>4</sub>)  $\delta$  ppm 50.04, 67.27, 113.78, 114.30, 115.41, 117.62, 121.39, 126.58, 128.55, 131.13, 134.07, 138.49, 139.12, 139.47 (d,  $J$ =20.89 Hz, 1 C), 140.69 (d,  $J$ =246.14 Hz, 1 C), 150.55 (d,  $J$ =10.90 Hz, 1 C), 153.86, 156.17 (d,  $J$ =2.73 Hz, 1 C), 164.72.

### BDP-CC-292 (5)

Azido-CC-292 (**3**) (0.5 mg) and 0.5 mg BDP FL alkyne (**4**, purchased from Lumiprobe) were added to a 1.5 mL glass reaction vial after which 0.2 mL *t*BuOH was added. Sodium ascorbate (2.3 mg) was dissolved in 0.5 mL H<sub>2</sub>O and 1.4 mg CuSO<sub>4</sub>·5H<sub>2</sub>O was dissolved in 0.1 mL H<sub>2</sub>O. Subsequently, 0.05 mL of each solution was added by pipette to the glass vial containing 0.2 mL *t*BuOH, Azido-CC-292 (**3**) and BDP FL Alkyne (**4**). The reaction mixture was stirred at room temperature overnight, filtered and then purified by HPLC using an analytical PFP column (Phenomenex, PFP, 250 × 4.6, 5  $\mu$ m). Chromatography was performed at a flow rate of 0.8 mL/min using a gradient of 0.020 M NH<sub>4</sub>OAc in H<sub>2</sub>O and MeCN. The mobile phase consisted of 0% MeCN (0 to 5 min), 0 to 50% MeCN (5 to 30 min), 50 to 100% MeCN (30 to 50 min), 100 to 0% MeCN (50 to 60 min). The pure product (**5**) eluted at 35.5 to 37.5 min and was characterized by ESI-MS and NMR spectroscopy.

ESI MS Calculated for C<sub>38</sub>H<sub>37</sub>BF<sub>3</sub>N<sub>11</sub>O<sub>3</sub>  $m/z$  [M+H]<sup>+</sup> 764.31, found 764.3,  $m/z$  [M+Na]<sup>+</sup> 786.31, found 786.3, HR MS Calculated for C<sub>38</sub>H<sub>37</sub>BF<sub>3</sub>N<sub>11</sub>O<sub>3</sub>  $m/z$  [M+H]<sup>+</sup> 764.31, found 764.3193.

<sup>1</sup>H NMR (500 MHz, DMSO-*d*<sub>6</sub>)  $\delta$  ppm 1.24 (s, 3 H), 2.36 - 2.38 (m, 2 H), 2.41 (s, 3 H), 2.64 - 2.65 (m, 2 H), 4.29 - 4.35 (m, 4 H), 4.69 - 4.72 (m, 2 H), 5.76 (s, 1 H), 6.33 (d,  $J$ =3.81 Hz, 1 H), 6.36 (d,  $J$ =3.20 Hz, 1 H), 6.53 (s, 1 H), 6.75 (d,  $J$ =9.46 Hz, 2 H), 7.05 (d,  $J$ =4.27 Hz, 1 H), 7.10 (s, 1 H), 7.12 - 7.19 (m, 3 H), 7.38 - 7.44 (m, 2 H), 7.48 - 7.56 (m, 3 H), 7.88 (d,  $J$ =11.90 Hz, 1 H), 8.09 (s, 1 H)

### Equilibrium target occupancy (MATLAB)

CC-292 is an irreversible inhibitor of Btk which binds to the ATP binding site (**Scheme S2**).

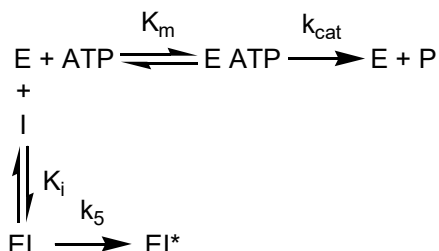

**Scheme S2.** Kinetic scheme for the reaction of Btk with an irreversible competitive inhibitor.

A model that correlates target occupancy with inhibitor concentration ([I]) at equilibrium was derived assuming the steady-state approximation for enzyme-substrate turnover, rapid equilibrium for initial

enzyme-inhibitor complex formation, and that negligible target degradation and re-synthesis occurred during the exposure of the cells to the inhibitor.

According to mass balance:

$$E_0 = E_t + ES + EI + EI^*$$

Therefore:

$$E_0 = E_t + E_t * \left(\frac{S}{K_m}\right) + E_t * \left(\frac{I}{K_i}\right) + EI^*$$

Rearrangement gives:

$$E_0 = E_t * \left(1 + \frac{S}{K_m} + \frac{I}{K_i}\right) + EI^*$$

$$\text{If } \alpha = \left(1 + \frac{S}{K_m} + \frac{I}{K_i}\right)$$

Then:

$$E_t = \frac{E_0 - EI^*}{\alpha}$$

**Eq. S1**

According to drug-target kinetics:

$$\frac{dEI^*}{dt} = k_5 * EI = k_5 * E_t * \left(\frac{I}{K_i}\right)$$

$$\frac{dEI^*}{dt} = \left(\frac{k_5 * I}{K_i}\right) * \left(\frac{E_0 - EI^*}{\alpha}\right)$$

and since  $K_i * \alpha = K_i^{app} + I$

Therefore:

$$\frac{dEI^*}{dt} = \left(\frac{k_5 * I}{K_i^{app} + I}\right) * (E_0 - EI^*)$$

$$\text{If } b = \left(\frac{k_5 * I}{K_i^{app} + I}\right)$$

$$\frac{dEI^*}{dt} = -b * (-E_0 + EI^*)$$

Solution of the above differential equation yields:

$$EI^* = EI_0^* * e^{-b*t} + E_0 * (1 - e^{-b*t})$$

Given that in the cellular target occupancy experiment, the initial concentration of irreversible enzyme-inhibitor complex is zero:

$$EI^* = E_0 * (1 - e^{-b*t})$$

Therefore, target occupancy (TO) is defined as:

$$TO = \frac{EI^*}{E_0} = 1 - e^{-b*t} \quad \text{Eq. S2}$$

and so:

$$TO = 1 - e^{-\left(\frac{k_5 * I}{K_i^{app} + I}\right) * t} \quad \text{Eq. S3}$$

### Model for cellular and *in vivo* target occupancy (MATLAB)

The concentrations of E, ES, EI and EI\* change over time as expressed by differential Eq. S4 to S8.

$$\frac{dE_t}{dt} = -k_3 * [I] * E_t + k_4 * EI - k_1 * [S] * E_t + k_2 * ES + k_{cat} * ES \quad \text{Eq. S4}$$

$$\frac{dES}{dt} = k_1 * [S] * E_t - k_2 * ES - k_{cat} * ES \quad \text{Eq. S5}$$

$$\frac{dP}{dt} = k_{cat} * ES \quad \text{Eq. S6}$$

$$\frac{dEI}{dt} = k_3 * [I] * E_t - k_4 * EI - k_5 * EI \quad \text{Eq. S7}$$

$$\frac{dEI^*}{dt} = k_5 * EI \quad \text{Eq. S8}$$

In which,  $E_{t=0} = E_0$ ;  $ES_{t=0} = 0$ ;  $P_{t=0} = 0$ ;  $EI_{t=0} = 0$  and  $EI^*_{t=0} = 0$ , and [S]=substrate concentration ([ATP]) which is assumed to be constant, and [I]= inhibitor concentration which is assumed to be constant in the cellular assays and to be the serum free fraction for the *in vivo* experiments.

Dividing both sides of **Eq. S4-S8** by  $[E_0]$  yields the relative fraction for each of the enzyme species.

From mass balance:  $E_0 = E + ES + EI + EI^*$

so  $E = E_0 - ES - EI - EI^*$

Converting the above mass-balance to the ratio of each enzyme species with respect to the initial total enzyme concentration, yields

$$E = 1 - ES - EI - EI^* \quad \text{Eq. S9}$$

Given that a fraction of the enzyme will be degraded and re-synthesized every hour (target turnover), **Eq. S9** can be converted to the following equation,

$$1 + \rho * t = E + ES + EI + EI^* \quad \text{Eq. S10}$$

where  $\rho$  is the fraction of enzyme that is turned over every hour

Under the steady state approximation,  $\frac{dES}{dt} = 0$ , therefore:

$$[E] = \frac{K_m}{[S]} * [ES] \quad \text{Eq. S11}$$

Assuming rapid-equilibrium for initial enzyme-inhibitor complex formation,

$$[EI] = \frac{[I]}{K_i} * [E]$$

so that

$$[EI] = \frac{[I]}{K_i} * \frac{K_m}{[S]} * [ES] \quad \text{Eq. S12}$$

Substitution into **Eq. S10** with the terms containing [ES] in **Eq. S11 and S12**, yields:

$$1 + \rho * t = \frac{K_m}{[S]} * ES + ES + \frac{[I]}{K_i} * \frac{K_m}{[S]} * [ES] + EI^*$$

$$1 + \rho * t = \left( 1 + \frac{K_m}{[S]} + \frac{[I]}{K_i} * \frac{K_m}{[S]} \right) * ES + EI^*$$

$$\left( 1 + \frac{K_m}{[S]} + \frac{[I]}{K_i} * \frac{K_m}{[S]} \right) = \beta \text{ and } \frac{K_m}{[S]} = M$$

$$1 + \rho * t = \beta * ES + EI^* \quad \text{Eq. S13}$$

Derivatization of both sides gives:

$$\rho = \beta * \frac{dES}{dt} + \frac{dEI^*}{dt} \quad \text{Eq. S14}$$

According to **Scheme S2**:

$$\frac{dEI^*}{dt} = k_5 * EI$$

Replacing  $\frac{dEI^*}{dt}$  in **Eq. S14** with the above definition, and EI with the definition in **Eq. S12** and EI\* with its equality presented in the **Eq. S13**, we have,

$$\rho = \beta * \frac{dES}{dt} + k_5 * \frac{[I]}{K_i} * \frac{K_m}{[S]} * [ES]$$

By rearrangement:

$$\frac{dES}{dt} = \frac{\rho}{\beta} - \left( \frac{k_5}{\beta} * \frac{[I]}{K_i} * \frac{K_m}{[S]} \right) * ES$$

$$\text{Considering } \left( \frac{k_5}{\beta} * \frac{[I]}{K_i} * \frac{K_m}{[S]} \right) = k$$

$$\frac{dES}{dt} = \frac{\rho}{\beta} - k * ES$$

Integration of the above equation gives:

$$ES = \frac{\rho}{\beta * k} + \gamma * e^{-k * t} \quad \text{Eq. S15}$$

$$\text{where } \gamma = ES_0 - \frac{\rho}{\beta * k}$$

Assuming that all non-ES forms of the enzyme complexes are representative of the occupied form of the enzyme, we have:

$$TO^t = \frac{1 + \rho * t - ES}{1 + \rho * t} = 1 - \frac{\frac{\rho}{\beta * k} + \gamma * e^{-k * t}}{1 + \rho * t} \quad \text{Eq. S16}$$

Note that the inhibitor concentration in the above equations, [I], is either the extracellular concentration in the cell-based experiments or the plasma free fraction of the drug and that  $K_i$  is  $K_i^{app}$ , which is measured based on drug total concentration in cellular assay or plasma free fraction *in vivo*.

To calculate target occupancy, drug concentration was incorporated into **Eq. S16** by incorporating a multi-dose PK model. Target occupancy was then used in the following equation (**Eq. 17**) to predict drug efficacy (in **Mathematica**) together with a sigmoidal term relates target occupancy and efficacy (target vulnerability):

$$\frac{dAD}{dt} = k_{inf} * \left( 1 - \left( \frac{(TO^t)^n}{(TO^t)^n + (TO_{50})^n} \right) \right) * (AD - AD_0) \quad \text{Eq. S17}$$

$k_{inf}$  is a rate constant for the change in AD ( $h^{-1}$ ) while AD is the ankle diameter in mm.  $AD_0$  is the ankle diameter in healthy rats,  $TO_{50}$  is the target occupancy that results in 50 percent of the maximum efficacy and  $n$  is the Hill coefficient that defines how steeply target occupancy and efficacy are correlated.

#### Inclusion of BTK inhibitor residence time in the mechanistic PK/PD model

To evaluate the impact of residence-time of reversible BTK inhibitors on the dynamics of target engagement and efficacy we need to include the BTK-inhibitor dissociation rate constant ( $k_6$ ) in the model (**Scheme S3**).

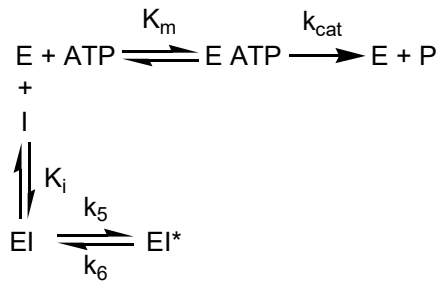

**Scheme S3.** Kinetic scheme for the reaction of BTK with a reversible competitive inhibitor.

**Eq. S7** and **S8** can be modified to include  $k_6$ , leading to modified versions of **Eq. S15** and **S16**.

$$\frac{dEI}{dt} = k_3 * \rho m * [I] * E_t - k_4 * EI - k_5 * EI + k_6 * EI^* \quad \text{Eq. S18 (modified version of Eq. S7)}$$

$$\frac{dEI^*}{dt} = k_5 * EI - k_6 * EI^* \quad \text{Eq. S19 (modified version of Eq. S8)}$$

According to **Eq. S14**, we have

$$\rho = \beta * \frac{dES}{dt} + \frac{dEI^*}{dt}$$

Replacing  $EI^*$  in the above equation with the definition in **Eq. S19**, and  $EI$  with the definition in **Eq. S12** and  $EI^*$  with the definition in **Eq. S13**, we have,

$$\rho = \beta * \frac{dES}{dt} + k_5 * \frac{[I]}{K_i} * \frac{K_m}{[S]} * [ES] - k_6 * (1 + \rho * t - \beta * ES)$$

By rearrangement:

$$\frac{dES}{dt} = \frac{\rho + k_6}{\beta} + k_6 * \rho * t - \left( \frac{k_5}{\beta} * \frac{[I]}{K_i} * \frac{K_m}{[S]} + k_6 \right) * ES$$

Assuming that  $\left( \frac{k_5}{\beta} * \frac{[I]}{K_i} * \frac{K_m}{[S]} + k_6 \right) = k$ , then

$$\frac{dES}{dt} = \frac{\rho + k_6}{\beta} + \frac{k_6}{\beta} * \rho * t - k * ES$$

Integration of the above equation gives

$$ES = \frac{\rho + k_6}{\beta * k} - \frac{k_6 * \rho}{\beta * k^2} + \frac{k_6}{\beta * k} * \rho * t + \gamma * e^{-k * t} \quad \text{Eq. S20 (modified version of Eq. S15)}$$

Where

$$\gamma = ES_0 - \frac{\rho + k_6}{\beta * k} + \frac{k_6 * \rho}{\beta * k^2}$$

Assuming that all non-ES forms of the enzyme represent occupied, inhibited enzyme, we have,

$$TO^t = \frac{1 + \rho * t - ES}{1 + \rho * t} = 1 - \frac{\frac{\rho + k_6}{\beta * k} - \frac{k_6 * \rho}{\beta * k^2} + \frac{k_6}{\beta * k} * \rho * t + \gamma * e^{-k * t}}{1 + \rho * t} \quad \text{Eq. S21 (modified version of Eq. S16)}$$

Incorporation of **Eq. S21** together with a multi-dose one-compartment PK model into **Eq. S17** allows the efficacy of a reversible competitive BTK inhibitor to be predicted.

### Inclusion of self-limitation term into the kinetics-driven PK/PD model

The rat CIA model shows spontaneous remission after 4 days. Using the same approach as that described by Liu et al.(1) we included a rate constant for self-resolution of the disease ( $k_{out}$ ) into a modified version of the PK/PD model (**Eq. S23**). The transit model used to derive **Eq. S23** is shown below (**Scheme S4**):

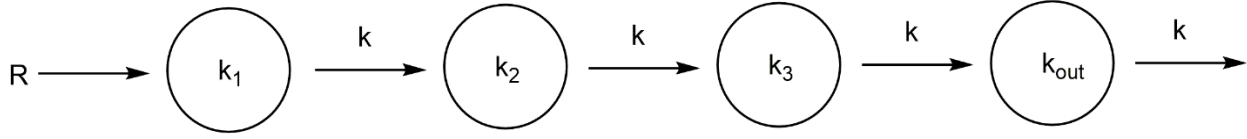

**Scheme S4.** Transit model used to obtain  $k_{out}$

$$\frac{dAD}{dt} = k_{inf} * \left( 1 - \left( \frac{(TO^t)^n}{(TO^t)^n + (TO_{50})^n} \right) \right) * (AD - AD_0) - k_{out} * (AD - AD_0) \quad \text{Eq. S23}$$

$$\frac{dk_1}{dt} = R - k * k_1 \quad \text{Eq. S24}$$

$$\frac{dk_2}{dt} = k * k_1 - k * k_2 \quad \text{Eq. S25}$$

$$\frac{dk_3}{dt} = k * k_2 - k * k_3 \quad \text{Eq. S26}$$

$$\frac{dk_{out}}{dt} = k * k_3 - k * k_{out} \quad \text{Eq. S27}$$

$AD_0$ , is a correction factor for the absolute value of AD. The derivatives for  $k_1$  to  $k_{out}$  represent the development of the self-resolution process over time. The term R in **Eq. S24** is the initial rate of decrease in ankle swelling before the self-resolution process starts. The transit rate constant, k, governs the transition from  $k_1$  to  $k_{out}$ , where  $k_{out}$  is the ultimate rate constant that describes the decrease in ankle swelling.

The initial values of  $k_1$ ,  $k_2$ ,  $k_3$  and  $k_{out}$  at time 0 are 0.

Values of  $AD_0$ , k and  $k_{inf}$ , were estimated by fitting the untreated (control) experimental data,  $TO^t = 0$ , to **Eq. S23- S27**, using a value of  $R = 0.001 \text{ h}^{-2}$  taken from Liu et al. (Table 3).(1) This gave  $AD_0$  (mm) 1.78, k ( $\text{h}^{-1}$ ) 0.012 and  $k_{inf}$  ( $\text{h}^{-1}$ ) 0.0031.

**Eq. S23** was then used to simulate efficacy using the values of  $AD_0$ , k and  $k_{inf}$ ,  $TO^t$  from **Eq. S16** and drug concentration from a multi-dose one-compartment PK model.

## Supplementary Tables

**Table S1. The Fraction of Btk in Total Protein in Ramos Cells**

| [CC-292]<br>(nM) | Fraction of Btk in total<br>protein (%) | Std. Dev. |
|------------------|-----------------------------------------|-----------|
| 0                | 3.70                                    | 1.62      |
| 0.4              | 2.84                                    | 1.46      |
| 1.5              | 2.86                                    | 1.81      |
| 5.9              | 2.41                                    | 1.46      |
| 11.7             | 2.46                                    | 1.68      |
| 93.8             | 2.50                                    | 1.60      |
| 750              | 3.56                                    | 3.01      |
| 3000             | 1.34                                    | 0.57      |

**Table S2. The Change in the Fraction of Btk in Total Protein in Ramos Cells as a Function of Time**

| Time after Drug<br>Washout (h) | Fraction of Btk in<br>total protein (%) | Std. Dev. |
|--------------------------------|-----------------------------------------|-----------|
| 0                              | 3.80                                    | 2.69      |
| 2                              | 3.07                                    | 0.49      |
| 18                             | 3.23                                    | 0.57      |
| 24                             | 2.89                                    | 0.45      |

**Table S3. Pharmacokinetic parameters for CC-292 in rats<sup>a</sup>**

| <b><i>In vivo data</i></b>     |                                            |                        |                      |                                      |                                      |                                            |                                               |
|--------------------------------|--------------------------------------------|------------------------|----------------------|--------------------------------------|--------------------------------------|--------------------------------------------|-----------------------------------------------|
| Dose<br>(mg kg <sup>-1</sup> ) | C <sub>max</sub><br>(ng mL <sup>-1</sup> ) | t <sub>max</sub> (min) | t <sub>1/2</sub> (h) | k <sub>a</sub><br>(h <sup>-1</sup> ) | k <sub>e</sub><br>(h <sup>-1</sup> ) | V <sub>d</sub> /F<br>(L kg <sup>-1</sup> ) | CL/F<br>(L h <sup>-1</sup> kg <sup>-1</sup> ) |
| 3                              | 235                                        | 30                     | 0.7                  | 3.5                                  | 1                                    | 8                                          | 8                                             |
| 30                             | 1003                                       | 40.2                   | 1.2                  | 3                                    | 0.6                                  | 20                                         | 12                                            |
| 100                            | 2979                                       | 36                     | 9                    | 8.5                                  | 0.08                                 | 32                                         | 2.4                                           |

<sup>a</sup>C<sub>max</sub>, maximum plasma concentration of CC-292; t<sub>max</sub>, time at which the maximum plasma concentration was observed; t<sub>1/2</sub>, half-life of CC-292; k<sub>a</sub> and k<sub>e</sub>, rates of absorption and elimination of CC-292, respectively; V<sub>d</sub>/F, apparent volume of distribution; CL/F, apparent clearance.

CC-292 is 92% protein bound.

***In vitro data:*** CC-292, free fraction of drug (f<sub>u</sub>) = 0.08

## Supplementary Figures

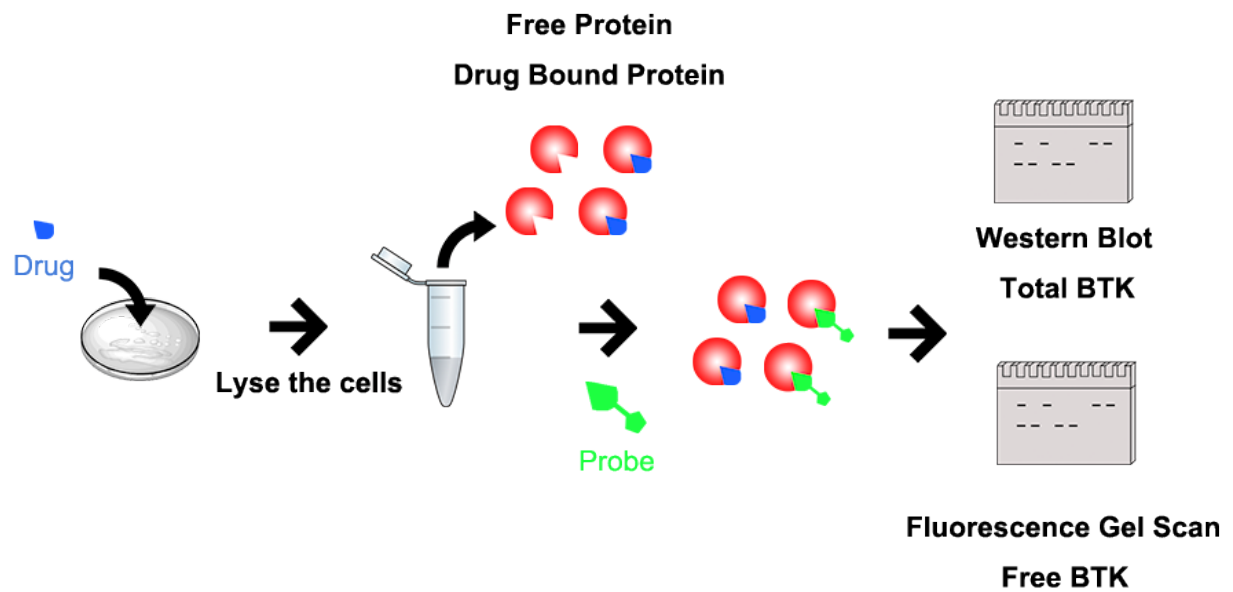

**Figure S1.** Method for experimentally quantifying target occupancy

## Fluorescence

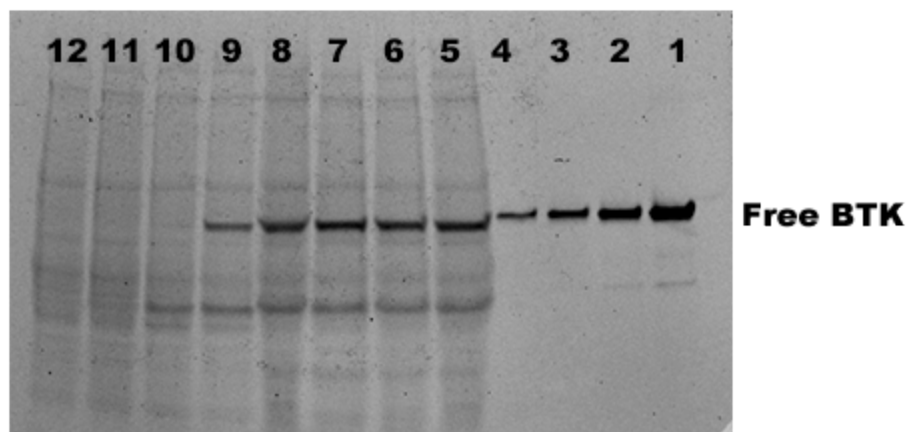

## Western Blot

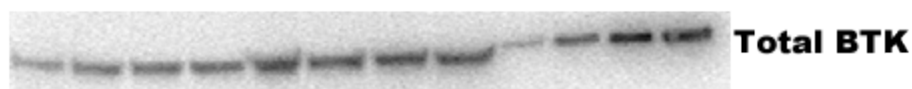

- |                      |                    |                     |
|----------------------|--------------------|---------------------|
| 1. 97.5 ng Pure BTK  | 5. DMSO            | 9. 11.718 nM CC-292 |
| 2. 48.75 ng Pure BTK | 6. 0.366 nM CC-292 | 10. 93.75 nM CC-292 |
| 3. 24.38 ng Pure BTK | 7. 1.46 nM CC-292  | 11. 750 nM CC-292   |
| 4. 12.19 ng Pure BTK | 8. 5.859 nM CC-292 | 12. 3000 nM CC-292  |

**Figure S2.** SDS-PAGE analysis of Btk engagement. Treatment of Ramos cells with varying concentrations of CC-292 resulted in alteration in fluorescence intensity of BDP-CC-292 bound to Btk whereas the luminescence from the western blot remained constant.

### Fluorescence

13 12 11 10 9 8 7 6 5 4 3 2 1

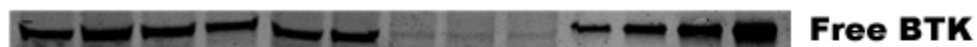

### Western Blot

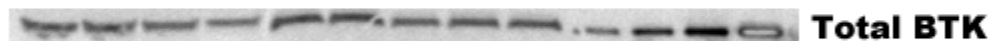

- |                      |                                        |
|----------------------|----------------------------------------|
| 1. 97.5 ng Pure BTK  | 5 to 7: 2 hours post drug treatment    |
| 2. 48.75 ng Pure BTK | 8 to 10: 18 hours post drug treatment  |
| 3. 24.38 ng Pure BTK | 11 to 13: 24 hours post drug treatment |
| 4. 12.19 ng Pure BTK |                                        |

**Figure S3.** *In vitro* Btk Turnover in Ramos Cells. SDS-PAGE showing the increase in fluorescence of the BDP-CC-292 probe as a function of time after CC-292 washout and also showing a western blot of total Btk.

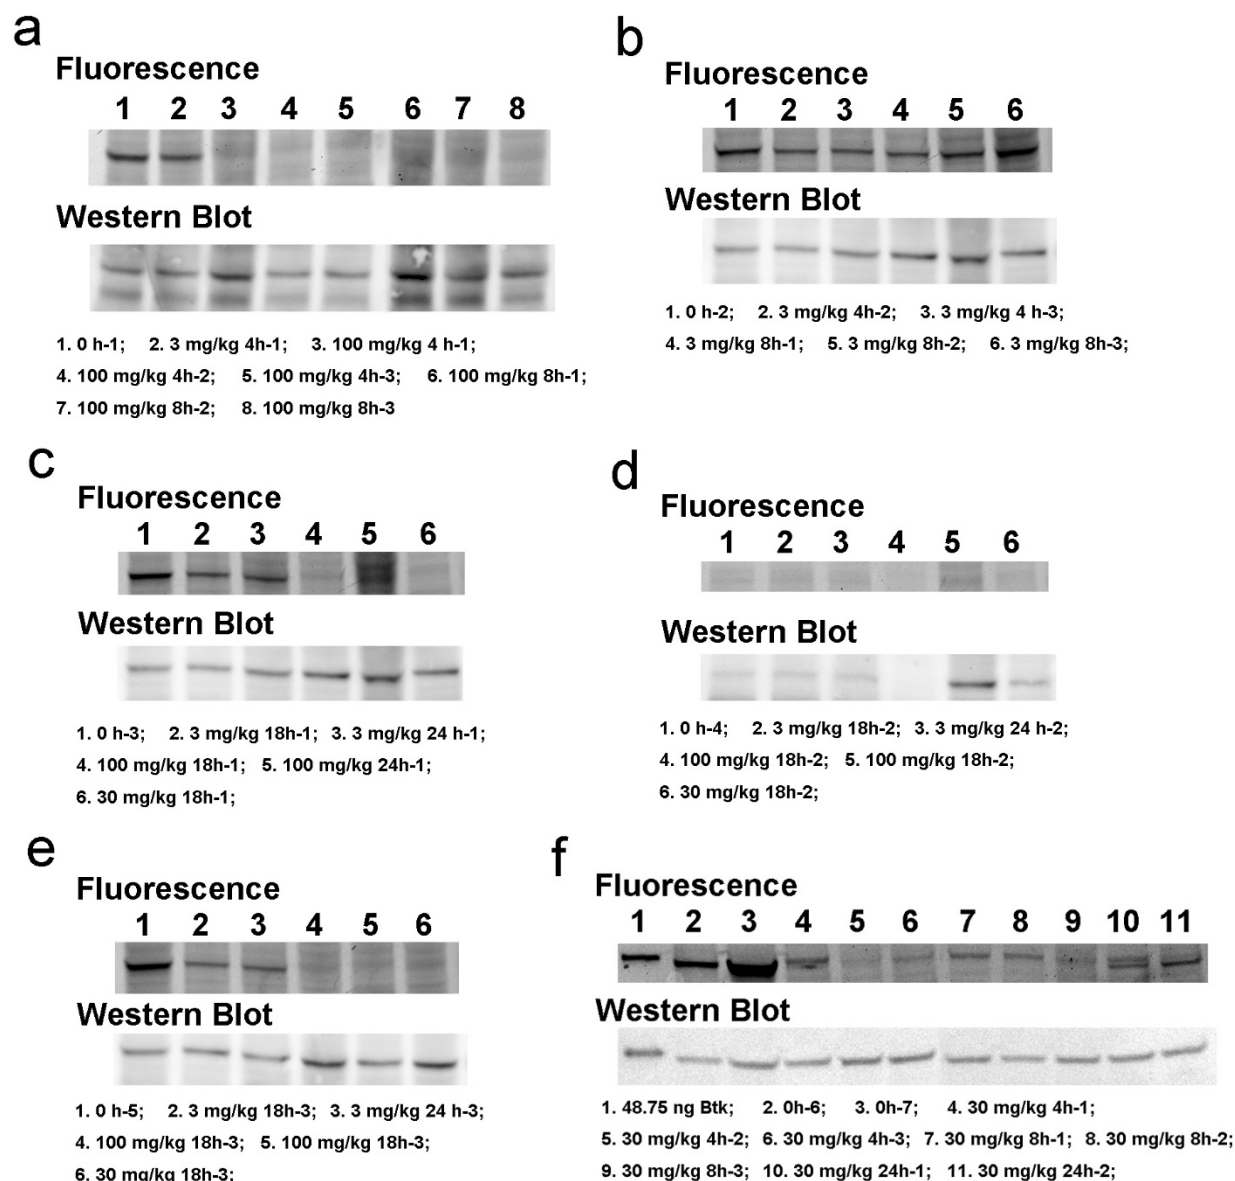

**Figure S4.** *In vivo* Btk Turnover in B Cells. SDS-PAGE showing the increase in fluorescence of the BDP-CC-292 probe as a function of time after CC-292 washout and also showing a western blot of total Btk.

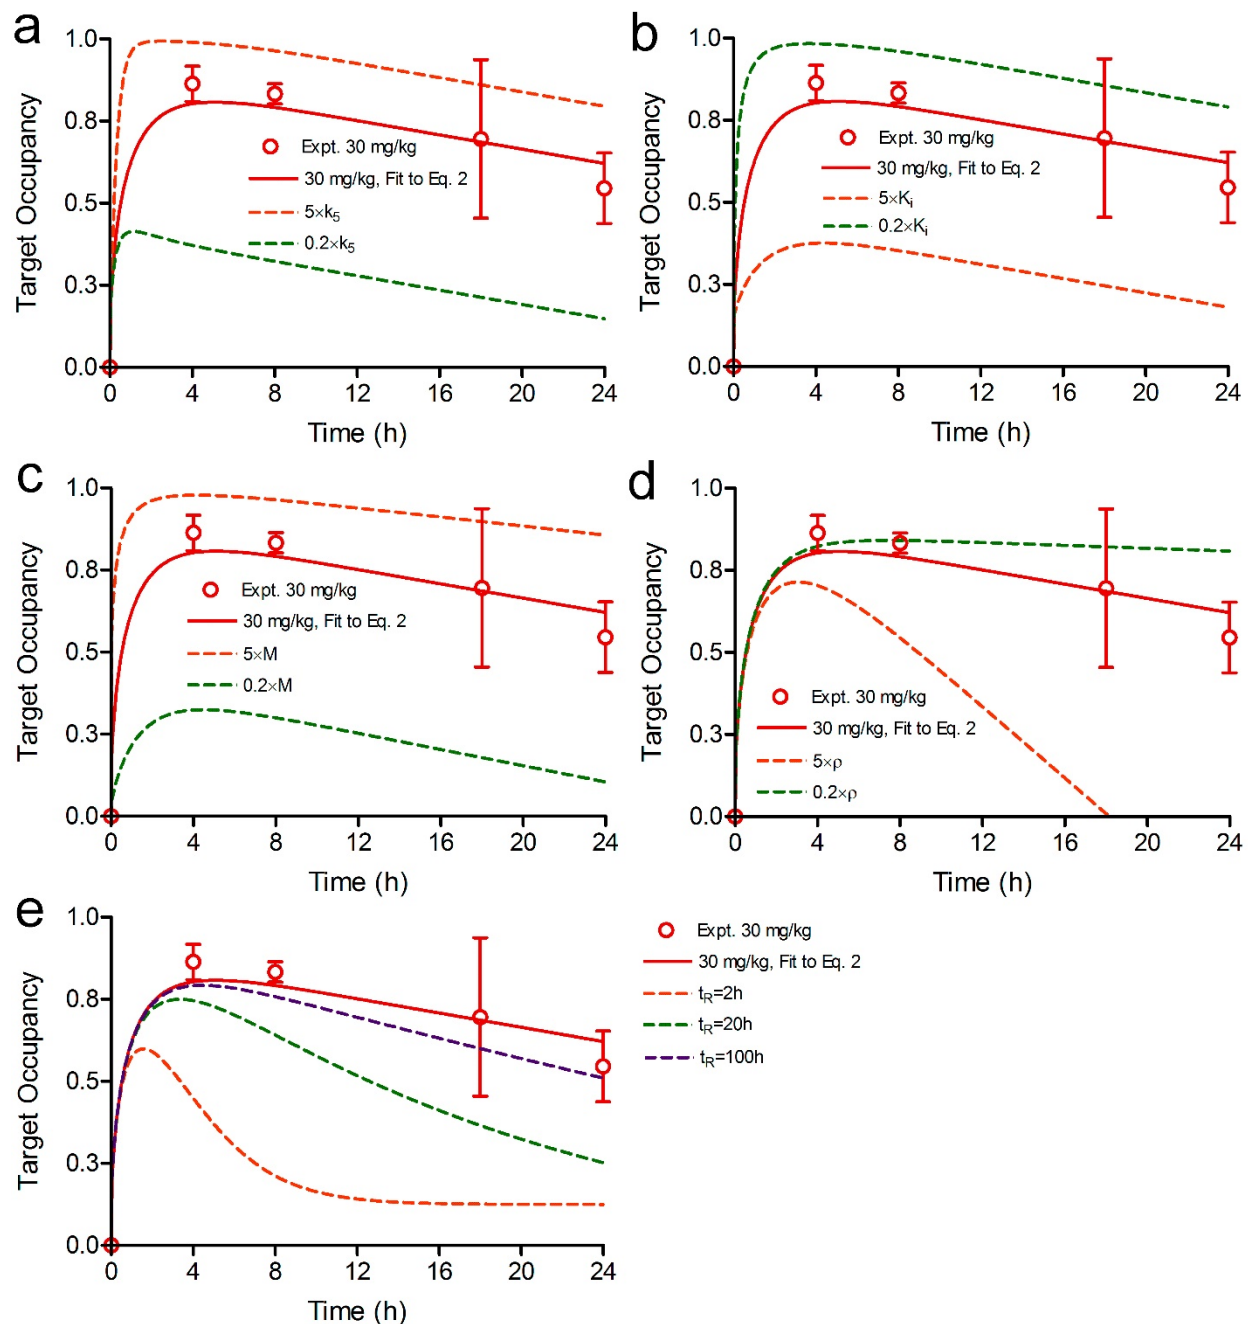

**Figure S5.** Sensitivity of simulated target occupancy to the values of  $k_5$ ,  $K_i$ ,  $p$ ,  $M$  and  $t_R$ . The experimentally determined *in vivo* target occupancy is shown in red points and the result of fitting to the target occupancy model is shown as a red solid line. In each case the target occupancy has been simulated after increasing or decreasing each parameter by a factor of 5. a)  $k_5$ , b)  $K_i$ , c)  $M$ , d)  $p$ , e)  $t_R$ .

# Compound Characterization

## Demethylated CC-292 (1) $^1\text{H}$ NMR

$^1\text{H}$  NMR (400 MHz, METHANOL- $d_4$ )  $\delta$  ppm 3.85 (t,  $J=4.80$  Hz, 2 H) 4.00 (t,  $J=4.80$  Hz, 2 H) 5.78 (dd,  $J=9.41$ , 2.13 Hz, 1 H) 6.33 - 6.40 (m, 1 H) 6.40 - 6.48 (m, 1 H) 6.80 - 6.86 (m, 2 H) 7.25 - 7.30 (m, 1 H) 7.38 - 7.45 (m, 4 H) 7.87 (d,  $J=4.02$  Hz, 1 H) 8.05 (t,  $J=2.00$  Hz, 1 H)

20141003 Pure De-Me-CC-292 1H.esp

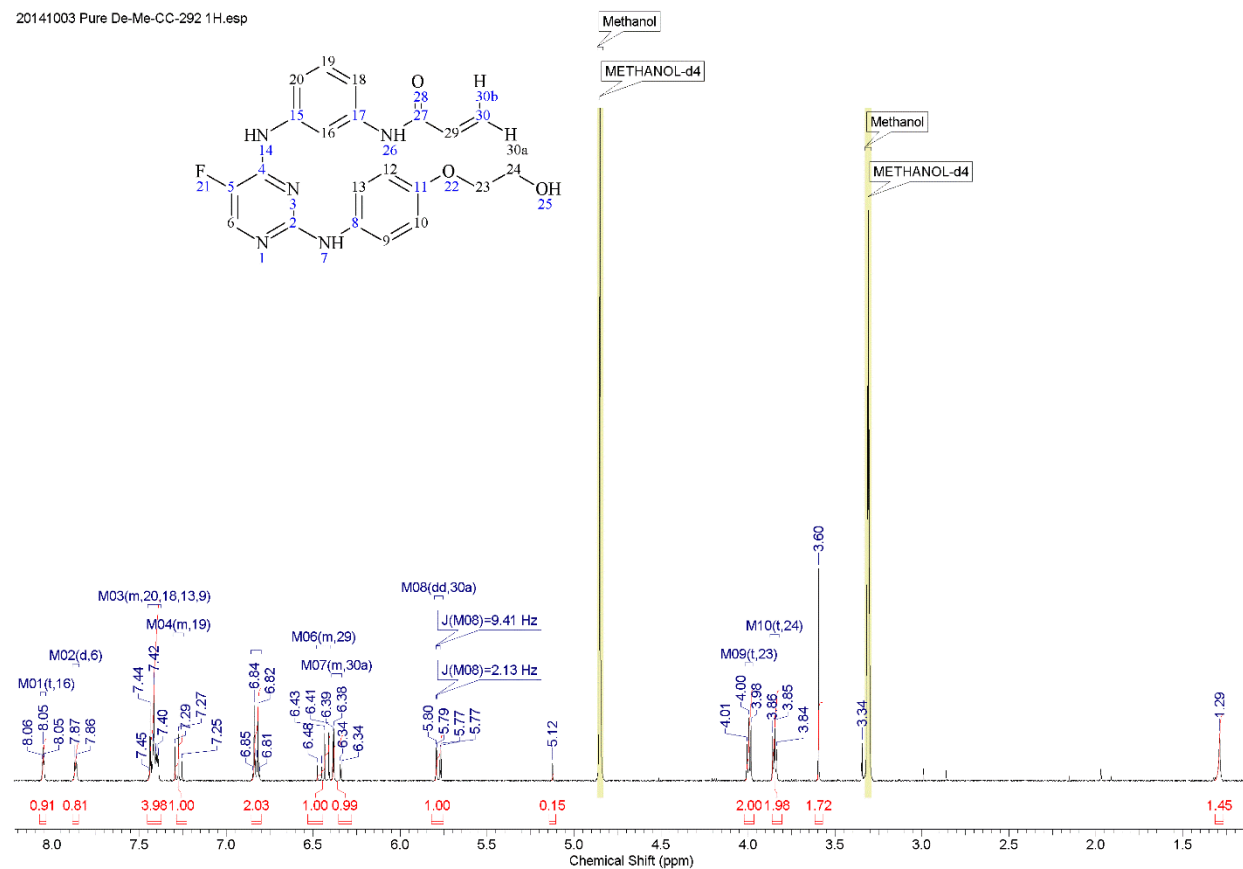

**Demethylated CC-292 (1)  $^{19}\text{F}$  NMR**

20141003 Pure De-Me-CC-292.002.001.1r.esp

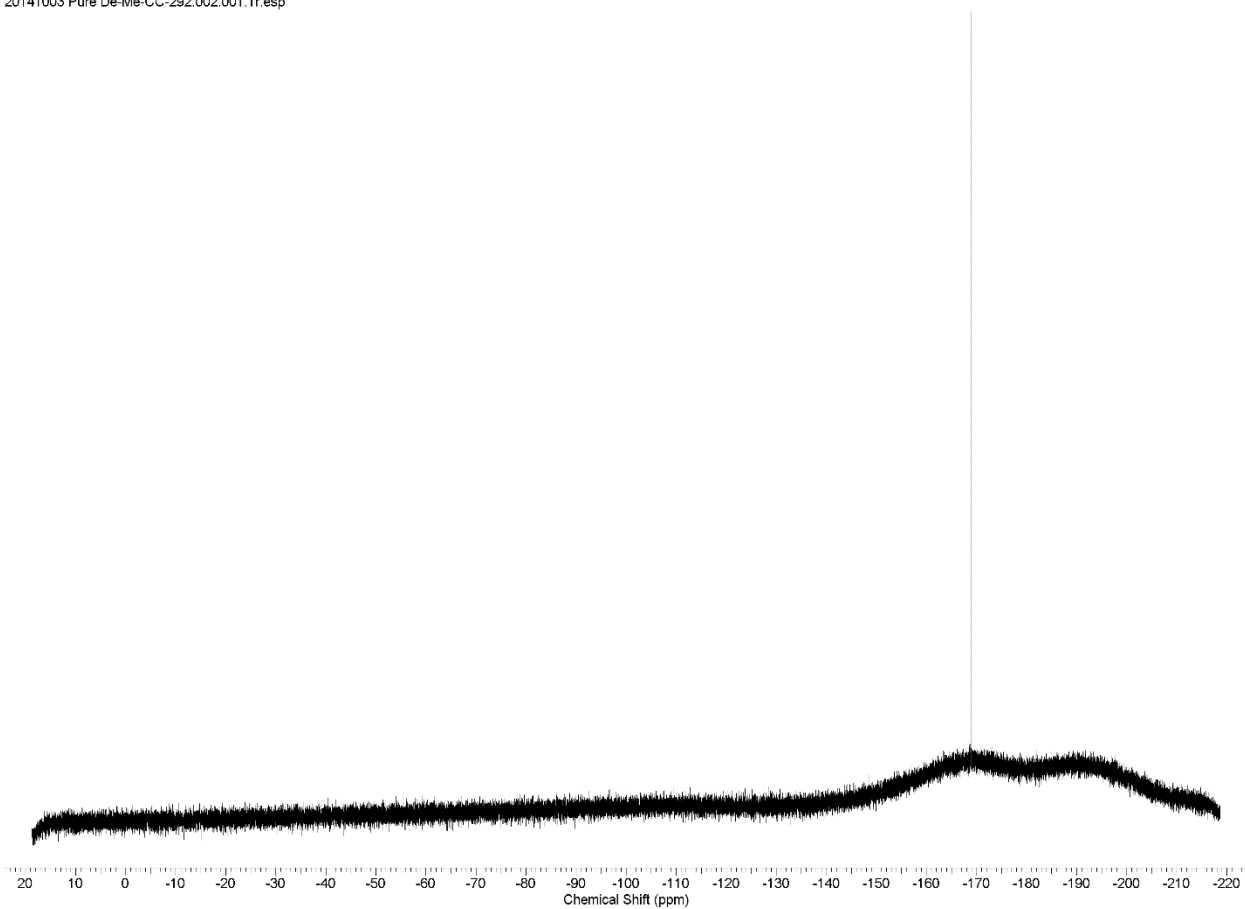

# Azido-CC-292 (3) <sup>1</sup>H NMR

<sup>1</sup>H NMR (400 MHz, METHANOL-*d*<sub>4</sub>) δ ppm 3.57 (t, *J*=4.90 Hz, 2 H) 4.12 (t, *J*=4.80 Hz, 2 H) 5.80 (dd, *J*=9.54, 2.26 Hz, 1 H) 6.35 - 6.41 (m, 1 H) 6.42 - 6.50 (m, 1 H) 6.82 - 6.86 (m, 2 H) 7.29 (t, *J*=7.90 Hz, 1 H) 7.39 - 7.50 (m, 4 H) 7.89 (d, *J*=3.89 Hz, 1 H) 8.08 (t, *J*=2.01 Hz, 1 H)

20141003 Pure azido-cc-292 probe 1h.esp

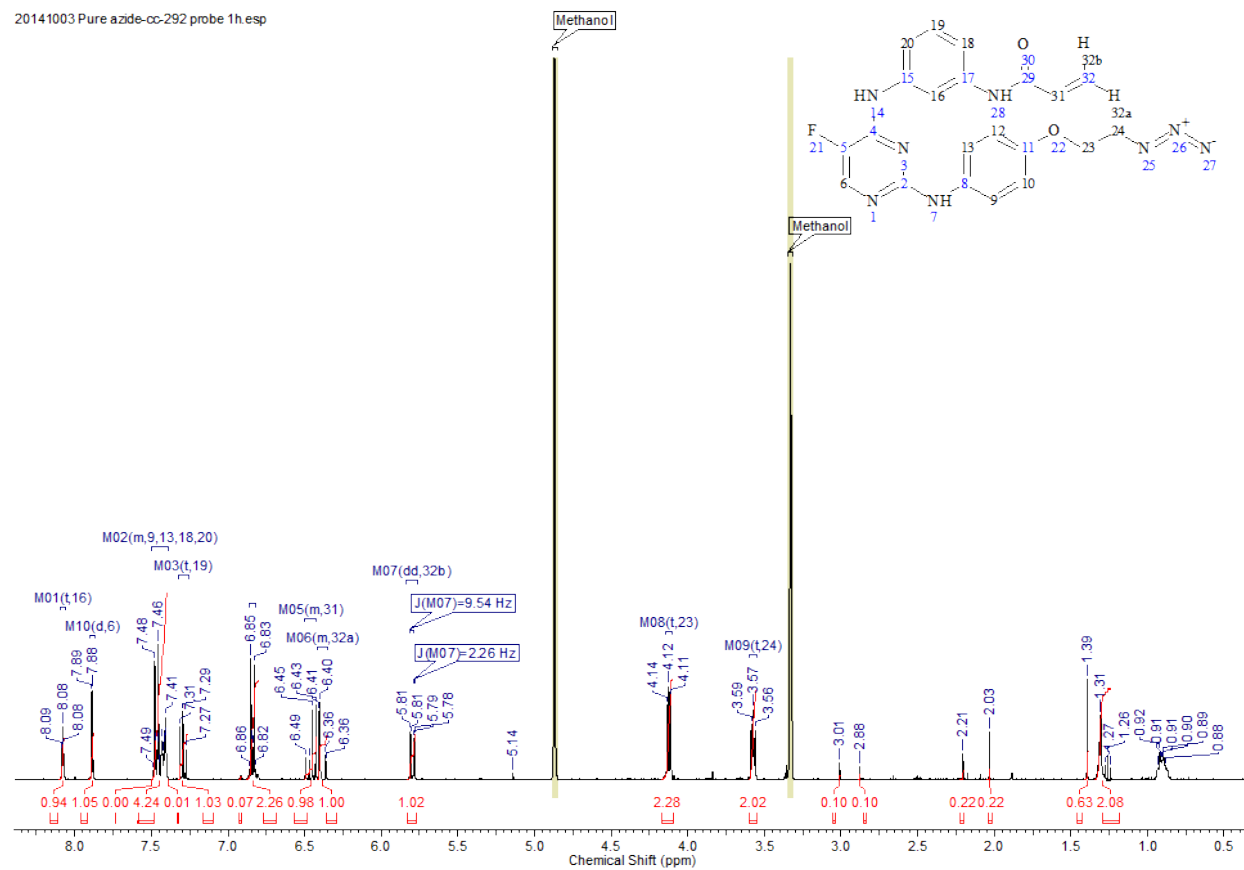

**Azido-CC-292 (3)  $^{19}\text{F}$  NMR**

12/9/2014 10:46:28 PM

$^{19}\text{F}$  NMR (376 MHz, METHANOL- $d_4$ )  $\delta$  ppm -168.74 (d,  $J=4.09$  Hz, 1 F)  
20141003 Pure azide-cc-292 probe 19f.esp

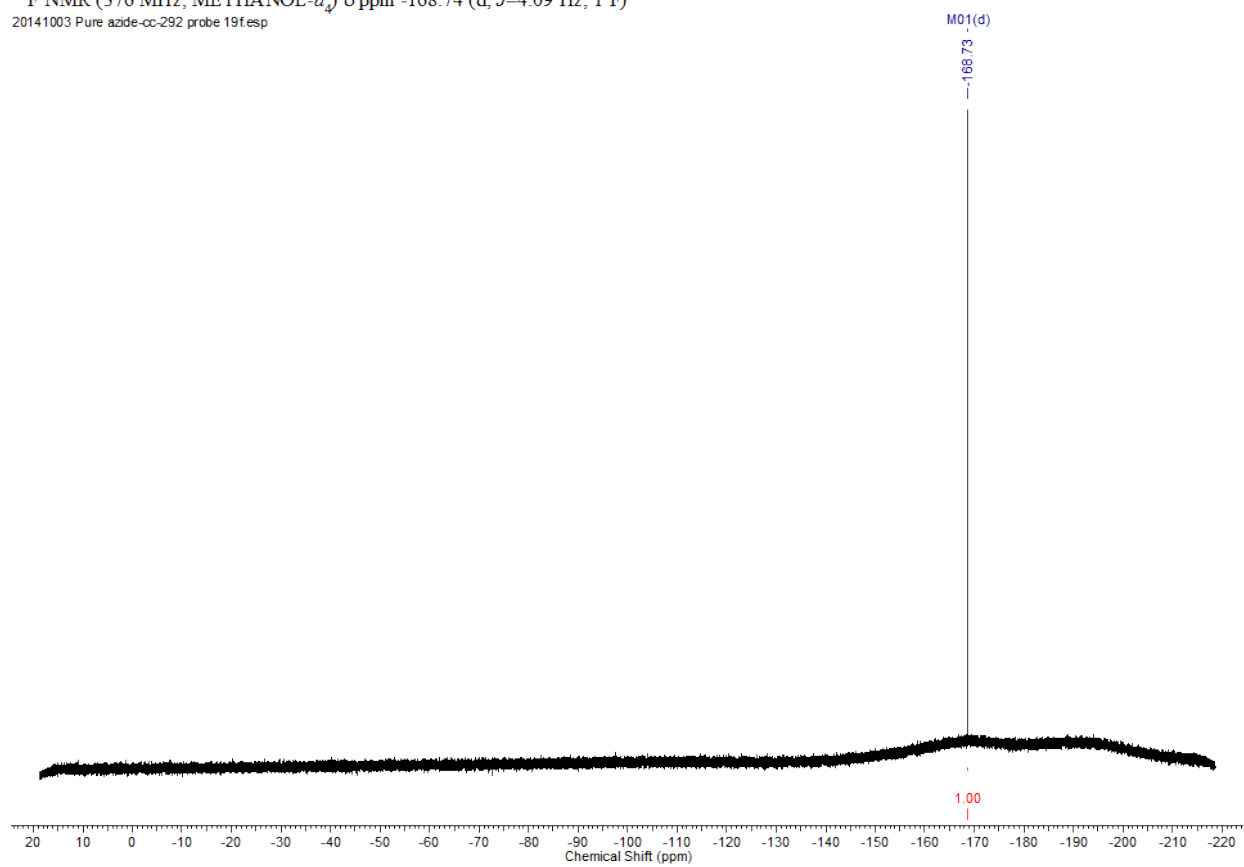

# **Azido-CC-292 (3) $^{13}\text{C}$ NMR**

12/9/2014 10:47:40 PM

$^{13}\text{C}$  NMR (126 MHz, METHANOL- $d_4$ )  $\delta$  ppm 50.04 (s, 1 C) 67.27 (s, 1 C) 113.78 (s, 1 C) 114.30 (s, 1 C) 115.41 (s, 1 C) 117.62 (s, 1 C) 121.39 (s, 1 C) 126.58 (s, 1 C) 128.55 (s, 1 C) 131.13 (s, 1 C) 134.07 (s, 1 C) 138.49 (s, 1 C) 139.12 (s, 1 C) 139.47 (d,  $J=20.89$  Hz, 1 C) 140.69 (d,  $J=246.14$  Hz, 1 C) 150.55 (d,  $J=10.90$  Hz, 1 C) 153.86 (s, 1 C) 156.17 (d,  $J=2.73$  Hz, 1 C) 164.72 (s, 1 C)

20141003 Pure CC-292 Azide Probe 13C.esp

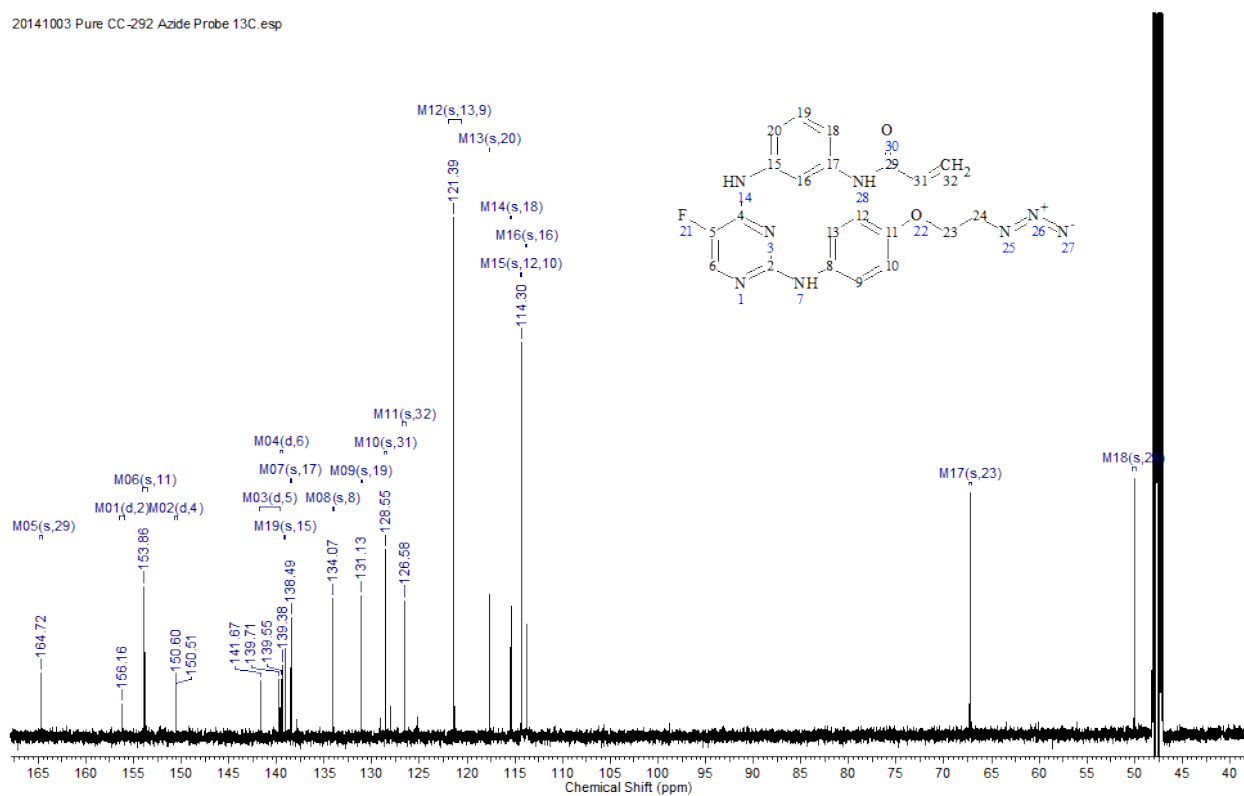

# BDP-CC-292 (5) ESI Mass

MSD1 SPC, time=0.160:0.611 of D:\CHEM32\DATA\TONGE\20150821 BDPP4 POS.D ES-API, Pos, Scan, Frag: 70

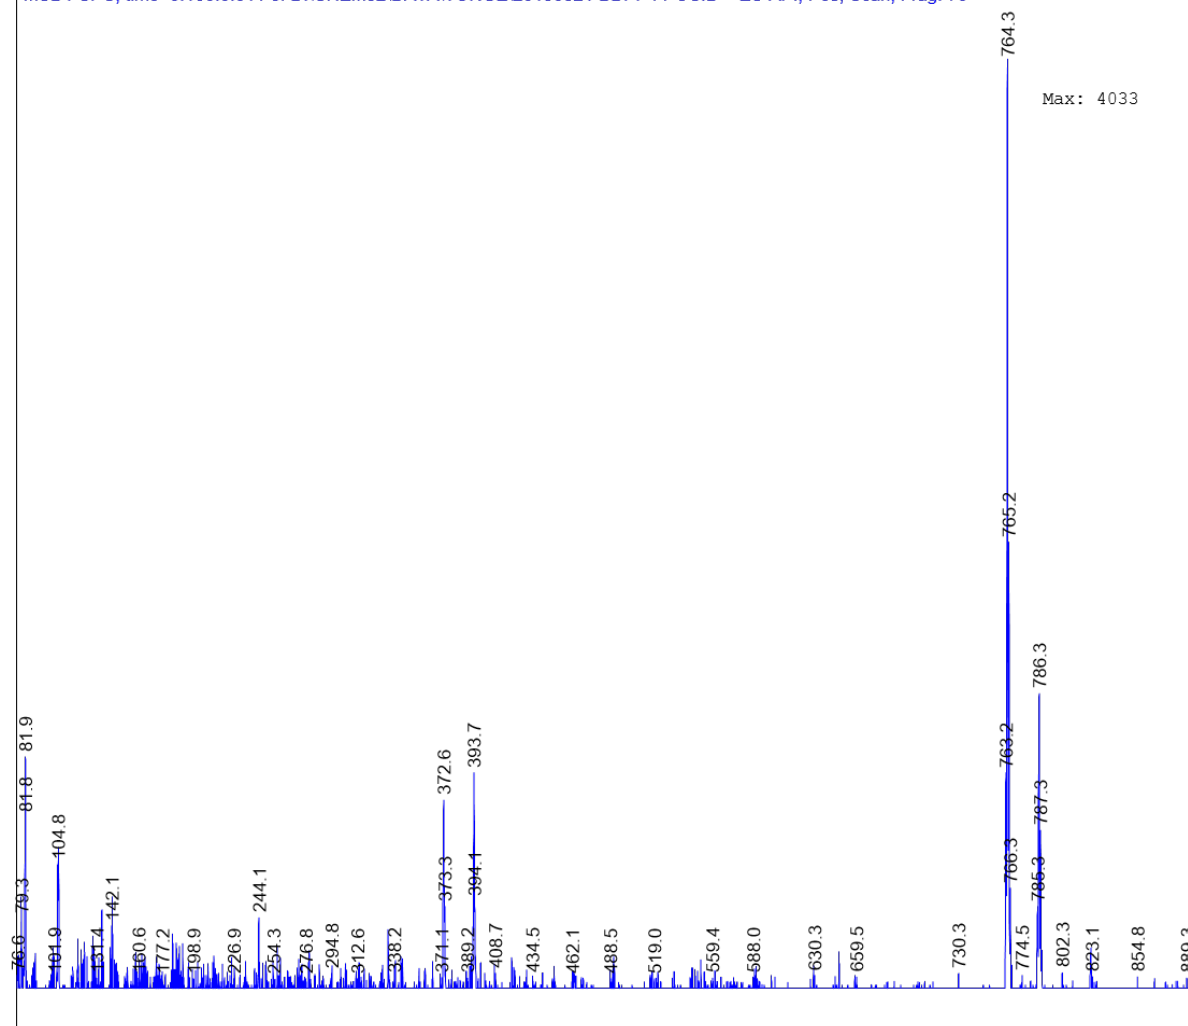

# BDP-CC-292 (5) HRMS

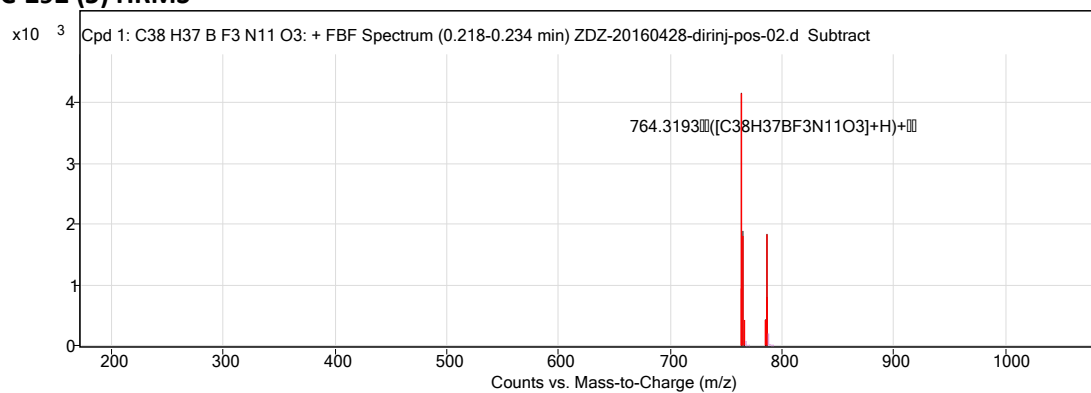

## BDP-CC-292 (5) HPLC chromatography

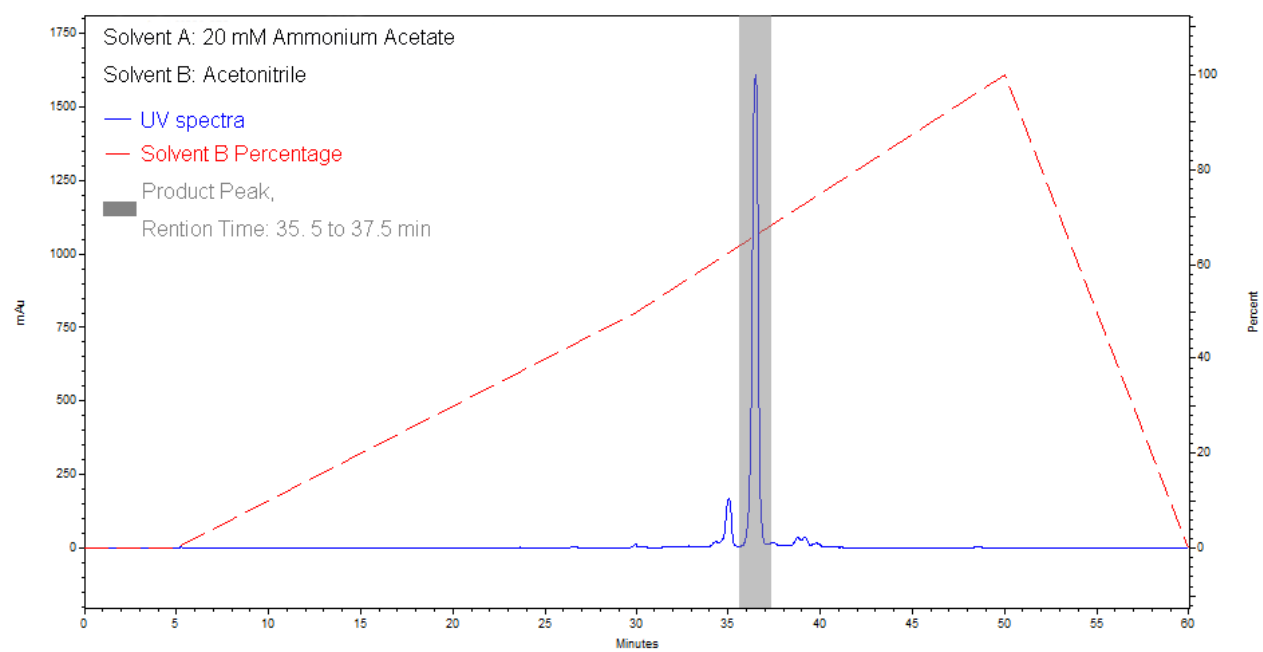

## References

1. Liu L, *et al.* (2011) Antiarthritis effect of a novel Bruton's tyrosine kinase (BTK) inhibitor in rat collagen-induced arthritis and mechanism-based pharmacokinetic/pharmacodynamic modeling: relationships between inhibition of BTK phosphorylation and efficacy. *J Pharmacol Exp Ther* 338(1):154-163.
